# Supplementary material
Source: publisher site journal article supplement (https://www.spandidos-publications.com/5805/downloadSupplementary)
Supplement: Supplementary file 1 [file downloadSupplementary]

Table SI. Patient characteristics.

| Characteristic                     | N-1               | N-2               | N-3               | T-1           | T-2           | T-3           |
|------------------------------------|-------------------|-------------------|-------------------|---------------|---------------|---------------|
| Age, years                         | 66                | 77                | 76                | 70            | 74            | 70            |
| Sex                                | M                 | M                 | F                 | M             | F             | M             |
| Stage                              | IV                | IV                | IV                | IV            | IV            | IV            |
| <i>EGFR</i> mutation status        | Exon 19 deletion  | Exon 19 deletion  | Exon 19 deletion  | Exon 21 L858R | Exon 21 L858R | Exon 21 L858R |
| Duration of gefitinib dosing, days | 741               | 936               | 326               | 42            | 81            | 119           |
| Days since first onset             | 40                | 683               | 172               | 81            | 41            | 70            |
| Hepatic injury <sup>a</sup>        | Gr 1 <sup>c</sup> | Gr 1 <sup>c</sup> | Gr 1 <sup>c</sup> | Gr 3          | Gr 3          | Gr 3          |
| AST/ALT <sup>b</sup>               | 61/45             | 45/32             | 26/30             | 150/239       | 215/296       | 232/376       |

<sup>a</sup>Common Terminology Criteria for Adverse Events (CTCAE) v5.0; <sup>b</sup>this row indicates maximum values of AST and ALT; <sup>c</sup>these were transient elevations and improved without discontinuation of gefitinib. EGFR, epidermal growth factor receptor; ND, not detected; D, detected; NA, not applicable; AST, aspartate transaminase; ALT, alanine transaminase; T, toxicity; N, no toxicity.
